# Supplementary material
Source: PubMed Central journal article supplement (PMC3111008)
Supplement: supp_1947601911405044_DS_10.1177_1947601911405044_FigS1.pdf [file supp_1947601911405044_DS_10.1177_1947601911405044_FigS1.pdf]

## A. KU812

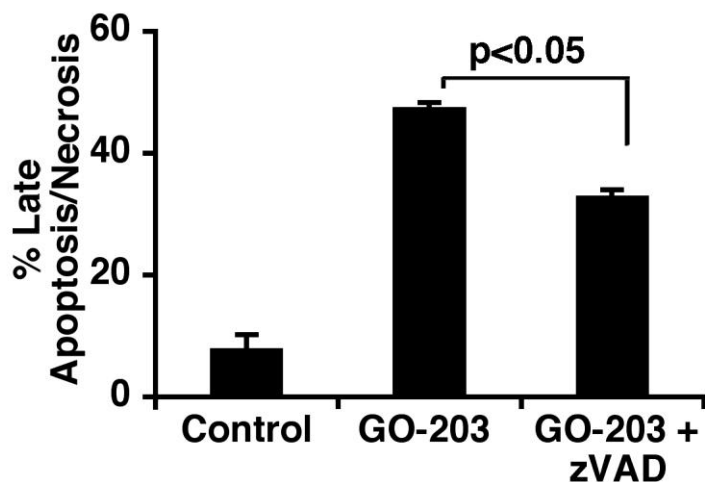

## B.

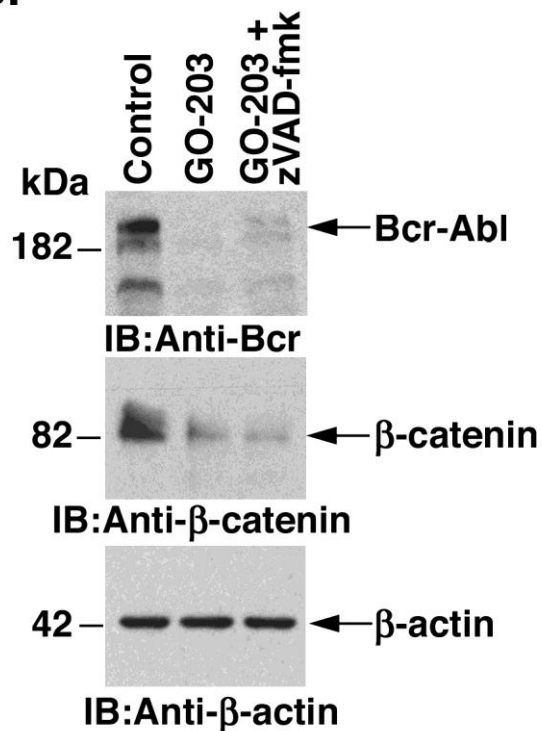

### Supplemental Figure Legend

**Supplemental Figure S1.** A. KU812 cells were treated with 5  $\mu$ M GO-203 each day for 2 days in the absence and presence of 5  $\mu$ M zVAD-fmk for the last day. Cells were stained with PI/Annexin V and analyzed by flow cytometry. The results (mean $\pm$ SD of three determinations) are expressed as the percentage of cells with late apoptosis/necrosis. Statistical significance was determined by the Student's *t*-test. B. Lysates were immunoblotted with the indicated antibodies.
